# Supplementary material for: UPLC-ESI-MS/MS Based Characterization of Active Flavonoids from Apocynum spp. and Anti-Bacteria Assay
Source: MDPI journal article supplement (doi:10.3390/antiox10121901), 2021-11-27
Supplement: s1 [file s1]

Supplementary materials.1. UPLC-ESI-MS/MS data of flavonoid ingredients characterized in the leaf extracts of *A. venetum* and *A. hendersonii*.

|                       | Peak | RT<br>(min) | UV<br>$\lambda_{\text{max}}$ | MS<br>[m/Z]- | Formula                                         | Tentative identification                |
|-----------------------|------|-------------|------------------------------|--------------|-------------------------------------------------|-----------------------------------------|
| <i>A. venetum</i>     | 1    | 10.113      | 202, 256, 355                | 464          | C <sub>21</sub> H <sub>20</sub> O <sub>12</sub> | Hyperoside                              |
|                       | 2    | 10.320      | 203, 256, 354                | 464          | C <sub>21</sub> H <sub>20</sub> O <sub>12</sub> | Isoquercetin                            |
|                       | 3    | 11.277      | 203, 256, 355                | 550          | C <sub>24</sub> H <sub>22</sub> O <sub>15</sub> | Quercetin-3-O-(6-O-malonyl)-Galactoside |
|                       | 4    | 11.420      | 203, 256, 355                | 550          | C <sub>24</sub> H <sub>22</sub> O <sub>15</sub> | Quercetin-3-O-(6-O-malonyl)-glucoside   |
|                       | 5    | 12.693      | 203, 256, 355                | 505          | C <sub>23</sub> H <sub>22</sub> O <sub>13</sub> | Quercetin-3-O-(6-O-acetyl)-galactoside  |
| <i>A. hendersonii</i> | 1    | 7.433       | 203, 256, 354                | 626          | C <sub>27</sub> H <sub>30</sub> O <sub>17</sub> | Quercetin 3-sophoroside (Baimaside)     |
|                       | 2    | 10.450      | 203, 256, 354                | 464          | C <sub>21</sub> H <sub>20</sub> O <sub>12</sub> | Isoquercetin                            |
|                       | 3    | 11.383      | 203, 256, 355                | 549          | C <sub>24</sub> H <sub>22</sub> O <sub>15</sub> | Quercetin-3-O-(6-O-malonyl)-Galactoside |
